# Supplementary material for: Stability and realized heritability of resistance to imidacloprid in the field- collected brown planthopper Nilaparvata lugens (Hemiptera: Delphacidae) from Lampung, Indonesia
Source: Research Square preprint supplement (doi:10.21203/rs.3.rs-7709102/v1), 2026-01-21

**Highlights**

- The five generations of selection with imidacloprid increased the resistance ratio (RR) from 52.36 to 180.46-fold in *N. lugens* collected from the District of Central Lampung, Lampung Province, Indonesia.
- The resistance to imidacloprid was unstable with a decrease of resistance from 180.46-fold to 39.46-fold after ten generations without selections.
- Continuous selections with imidacloprid for the next three generations may enhance resistance level of 180.46-fold to 235.93-fold.
- The estimated realized heritability values (*h2*) for imidacloprid resistance were 0.1465 and 0.1348 for five and eight generations of selection, respectively.

**Graphical abstract**


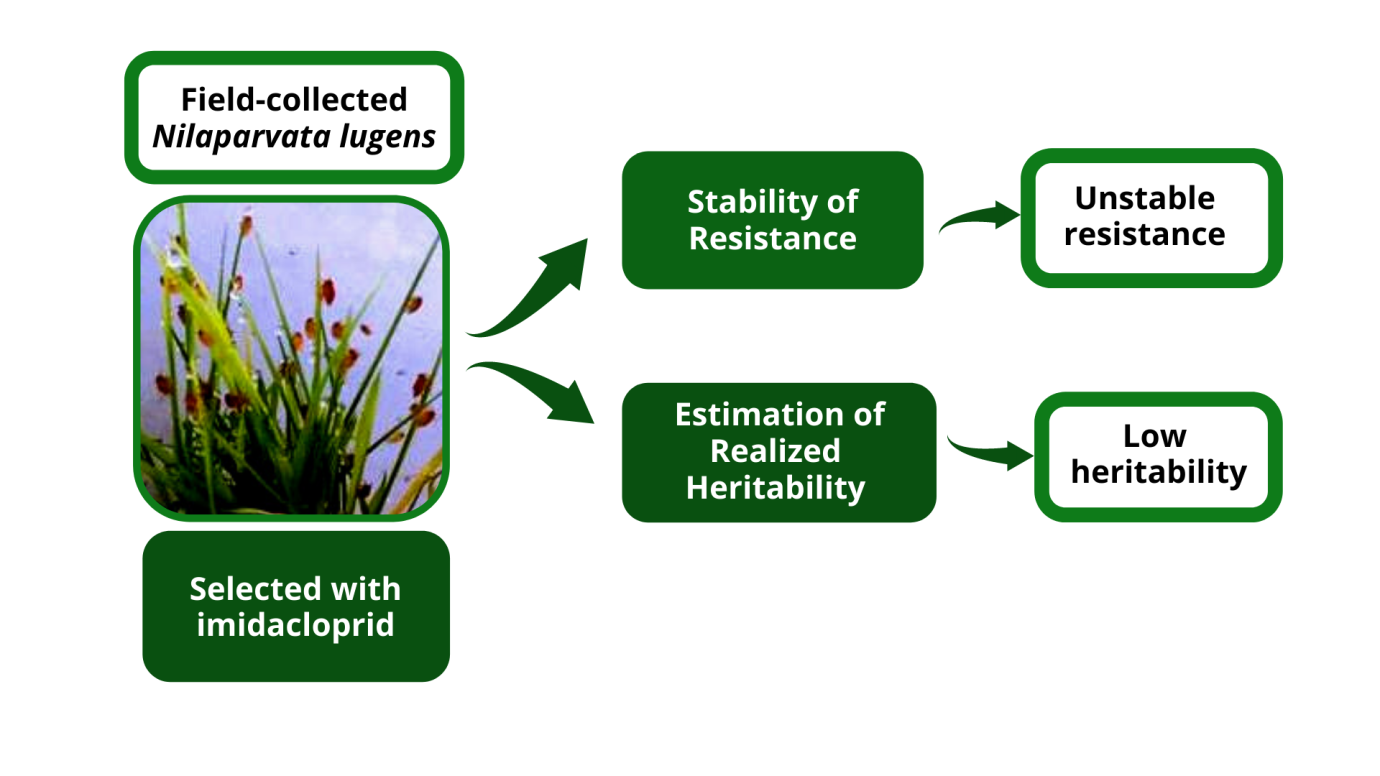

Supplement: Supplementary file 1 [file 683154e95e89b5c669faed8a.docx]
